# Supplementary material for: The Effect of Scale Insects on Growth Parameters of cv. Chardonnay and cv. Sauvignon Blanc Grapevines Grown in a Greenhouse
Source: MDPI journal article supplement (doi:10.3390/ijms24021544), 2023-01-12
Supplement: s1 [file s1]

**Table S1.** Volatile organic compounds (VOCs) that were found by HS-SPME-GC/MS. RT=retention time, CAS# = chemical abstracts service registry number, NIST = National Institute of Standards and Technology (mass spectral library), FM = mass spectral forward match, RM = mass spectral reverse match, RI = Kovats non-isothermal retention index, PubChem CID = compound identification number, MSI = Metabolomics Standard Initiative. Calculated RI refers to the RT of each endogenous VOC respective to the RTs of the *n*-alkanes in the 10 µg/L of *n*-hydrocarbon standard mix (C<sub>9</sub>–C<sub>22</sub>) during the GC/MS analysis and calculated based on the Van den Dool and Kratz RT conversion equation for non-isothermal Kovats RI and matched to the RI values found in the NIST and PubChem databases.

| Name                                                             | Biochemical class | RT (min) | Formula                                        | Base Peak (m/z) | CAS #      | NIST FM | NIST RM | NIST RI      | Calculated RI | PubChem RI | PubChem CID | Authentic Standards | MSI confidence level |
|------------------------------------------------------------------|-------------------|----------|------------------------------------------------|-----------------|------------|---------|---------|--------------|---------------|------------|-------------|---------------------|----------------------|
| Pentanoic acid                                                   | Acid              | 8.069    | C <sub>5</sub> H <sub>10</sub> O <sub>2</sub>  | 60.1            | 109-52-4   | 768     | 830     | 903±17 (48)  | 892           | 872        | 7991        | Yes                 | 1                    |
| 3-Heptenoic acid                                                 | Acid              | 13.767   | C <sub>7</sub> H <sub>12</sub> O <sub>2</sub>  | 68.1            | 29901-85-7 | 720     | 733     | 1081         | 1082          |            | 5282710     |                     | 2                    |
| Octanoic acid                                                    | Acid              | 16.631   | C <sub>8</sub> H <sub>16</sub> O <sub>2</sub>  | 60.1            | 124-07-2   | 780     | 857     | 1180±7 (100) | 1178          | 1178       | 379         |                     | 2                    |
| Nonanoic acid *                                                  | Acid              | 19.432   | C <sub>9</sub> H <sub>18</sub> O <sub>2</sub>  | 60.1            | 112-05-0   | 871     | 927     | 1273±7 (96)  | 1277          | 1277       | 8158        |                     | 2                    |
| Ethanol, 2-butoxy-                                               | Alcohol           | 8.413    | C <sub>6</sub> H <sub>14</sub> O <sub>2</sub>  | 57.1            | 111-76-2   | 772     | 869     | 906±2 (22)   | 905           | 905        | 8133        |                     | 2                    |
| 1-Octen-3-ol                                                     | Alcohol           | 10.692   | C <sub>8</sub> H <sub>16</sub> O               | 57.1            | 3391-86-4  | 766     | 927     | 980±2 (355)  | 981           | 981        | 18827       |                     | 2                    |
| 3-Ethyl-4-methylpentan-1-ol *                                    | Alcohol           | 11.970   | C <sub>8</sub> H <sub>18</sub> O               | 69.1            | 38514-13-5 | 874     | 936     | 1023±3 (3)   | 1023          | 1023       | 549664      |                     | 2                    |
| 1-Hexanol, 2-ethyl-                                              | Alcohol           | 12.192   | C <sub>8</sub> H <sub>18</sub> O               | 57.1            | 104-76-7   | 760     | 877     | 1030±3 (90)  | 1031          | 1031       | 7720        | Yes                 | 1                    |
| Phenylethyl Alcohol                                              | Alcohol           | 14.823   | C <sub>8</sub> H <sub>10</sub> O               | 91              | 60-12-8    | 927     | 940     | 1116±5 (261) | 1117          | 1117       | 6054        | Yes                 | 1                    |
| 1-Nonanol *                                                      | Alcohol           | 16.483   | C <sub>9</sub> H <sub>20</sub> O               | 56.1            | 143-08-8   | 901     | 933     | 1173±2 (62)  | 1173          | 1173       | 8914        |                     | 2                    |
| Ethanol, 2-(2-butoxyethoxy)-                                     | Alcohol           | 16.913   | C <sub>8</sub> H <sub>18</sub> O <sub>3</sub>  | 45.1            | 112-34-5   | 881     | 918     | 1192±4 (15)  | 1188          | 1188       | 8177        |                     | 2                    |
| 2-Propanol, 1-(2-butoxy-1-methylethoxy)-(isomer 1)               | Alcohol           | 18.378   | C <sub>10</sub> H <sub>22</sub> O <sub>3</sub> | 59.1            | 29911-28-2 | 842     | 875     |              | 1239          |            | 24752       |                     | 3                    |
| 2-Propanol, 1-(2-butoxy-1-methylethoxy)-(isomer 2)               | Alcohol           | 18.513   | C <sub>10</sub> H <sub>22</sub> O <sub>3</sub> | 59.1            | 29911-28-2 | 842     | 875     |              | 1244          |            | 24752       |                     | 3                    |
| Propanoic acid, 2-methyl-, 3-hydroxy-2,2,4-trimethylpentyl ester | Alcohol           | 22.084   | C <sub>12</sub> H <sub>24</sub> O <sub>3</sub> | 71.1            | 77-68-9    | 856     | 878     | 1380±0 (2)   | 1374          | 1380       | 6490        | Yes                 | 1                    |

|                                                   |               |        |          |       |            |     |     |              |      |      |         |     |   |
|---------------------------------------------------|---------------|--------|----------|-------|------------|-----|-----|--------------|------|------|---------|-----|---|
| 1-Dodecanol                                       | Alcohol       | 24.740 | C12H26O  | 55.1  | 112-53-8   | 858 | 951 | 1473±4 (64)  | 1474 | 1474 | 8193    |     | 2 |
| 2-Pentenal, (E)-                                  | Aldehyde      | 4.850  | C5H8O    | 55.1  | 1576-87-0  | 809 | 834 | 754±5 (30)   | 764  | 724  | 5364752 |     | 2 |
| Hexanal                                           | Aldehyde      | 5.749  | C6H12O   | 56    | 66-25-1    | 831 | 893 | 800±2 (453)  | 800  | 755  | 6184    | Yes | 1 |
| 2-Hexenal, (E)-                                   | Aldehyde      | 7.100  | C6H10O   | 41    | 6728-26-3  | 885 | 915 | 854±3 (243)  | 853  | 800  | 5281168 | Yes | 1 |
| 2,4-Hexadienal, (E,E)-                            | Aldehyde      | 8.677  | C6H8O    | 81.1  | 142-83-6   | 906 | 942 | 911±3 (32)   | 913  | 913  | 637564  |     | 2 |
| 2-Heptenal, (Z)-                                  | Aldehyde      | 10.018 | C7H12O   | 41.1  | 57266-86-1 | 864 | 955 | 958±6 (19)   | 958  | 958  | 5362616 |     | 2 |
| (E)-4-Oxohept-2-enal                              | Aldehyde      | 10.163 | C6H8O2   | 83.1  | 2492-43-5  | 836 | 859 | 958±N/A (1)  | 963  | 976  | 6365145 |     | 2 |
| 2,4-Heptadienal, (Z,Z)-                           | Aldehyde      | 11.277 | C7H10O   | 81    |            | 849 | 889 |              | 1001 | 1001 | 6429263 |     | 3 |
| Octanal                                           | Aldehyde      | 11.422 | C8H16O   | 43.1  | 124-13-0   | 819 | 931 | 1003±2 (364) | 1005 | 1005 | 454     | Yes | 1 |
| 2,4-Heptadienal, (E,E)-                           | Aldehyde      | 11.713 | C7H10O   | 81    | 4313-03-5  | 875 | 880 | 1012±4 (108) | 1015 | 1015 | 5283321 |     | 2 |
| 2-Octenal, (E)-                                   | Aldehyde      | 13.116 | C8H14O   | 55    | 2548-87-0  | 854 | 870 | 1060±3 (124) | 1061 | 1061 | 5283324 |     | 2 |
| Nonanal                                           | Aldehyde      | 14.534 | C9H18O   | 41    | 124-19-6   | 846 | 850 | 1104±2 (556) | 1108 | 1108 | 31289   |     | 2 |
| 2,6-Nonadienal, (E,Z)-                            | Aldehyde      | 15.961 | C9H14O   | 41.1  | 557-48-2   | 902 | 924 | 1155±3 (124) | 1156 | 1156 | 643731  | Yes | 1 |
| 2-Nonenal, (E)-                                   | Aldehyde      | 16.173 | C9H16O   | 43.1  | 18829-56-6 | 851 | 914 | 1162±3 (223) | 1163 | 1163 | 5283335 |     | 2 |
| 2-Nonenal, 8-oxo-                                 | Aldehyde      | 17.349 | C9H14O2  | 43    | 2658-60-8  | 759 | 783 |              | 1203 |      | 250594  |     | 3 |
| Decanal                                           | Aldehyde      | 17.504 | C10H20O  | 43.1  | 112-31-2   | 887 | 911 | 1206±2 (406) | 1208 | 1208 | 8175    | Yes | 1 |
| 2,4-Nonadienal                                    | Aldehyde      | 17.819 | C9H14O   | 81.1  | 6750-03-4  | 909 | 954 | 1213±10 (32) | 1219 | 1219 | 5283339 |     | 2 |
| Undecanal                                         | Aldehyde      | 20.353 | C11H22O  | 43    | 112-44-7   | 830 | 855 | 1307±2 (152) | 1310 | 1310 | 8186    |     | 2 |
| 5-Hepten-2-one, 6-methyl-                         | Apocarotenoid | 10.847 | C8H14O   | 43    | 110-93-0   | 887 | 930 | 986±2 (222)  | 986  | 986  | 9862    | Yes | 1 |
| 1-Cyclohexene-1-carboxaldehyde, 2,6,6-trimethyl-* | Apocarotenoid | 17.958 | C10H16O  | 137.1 | 432-25-7   | 879 | 909 | 1220±3 (75)  | 1224 | 1224 | 9895    | Yes | 1 |
| β-Citral                                          | Apocarotenoid | 18.443 | C10H16O  | 41.1  | 5392-40-5  | 929 | 929 | 1240±3 (168) | 1241 | 1241 | 643779  | Yes | 1 |
| α-Citral                                          | Apocarotenoid | 19.274 | C10H16O  | 69.1  | 141-27-5   | 860 | 875 | 1270±2 (36)  | 1271 | 1271 | 638011  | Yes | 1 |
| alpha-Ionone                                      | Apocarotenoid | 23.413 | C13H20O  | 121.1 | 127-41-3   | 849 | 853 | 1426±4 (69)  | 1424 | 1424 | 5282108 | Yes | 1 |
| Dihydropseudoionone                               | Apocarotenoid | 24.010 | C13H22O  | 43    | 689-67-8   | 927 | 931 | 1456±5 (14)  | 1447 | 1447 | 1549778 | Yes | 1 |
| trans-.beta.-Ionone                               | Apocarotenoid | 24.909 | C13H20O  | 177.1 | 79-77-6    | 913 | 918 | 1486±4 (210) | 1481 | 1481 | 638014  | Yes | 1 |
| β-Ionon-5,6-epoxide                               | Apocarotenoid | 25.003 | C13H20O2 | 123.1 | 23267-57-4 | 913 | 925 | 1473±18 (9)  | 1484 | 1484 | 5352481 | Yes | 1 |

|                                                         |                   |        |          |       |            |     |     |                    |      |      |           |     |   |
|---------------------------------------------------------|-------------------|--------|----------|-------|------------|-----|-----|--------------------|------|------|-----------|-----|---|
| 3-Oxo- $\alpha$ -ionol *                                | Apocarotenoid     | 28.649 | C13H20O2 | 108.1 | 34318-21-3 | 876 | 911 | 1647 $\pm$ 16 (13) | 1651 |      | 273524347 |     | 2 |
| Farnesylacetone (5E,9E)                                 | Apocarotenoid     | 31.553 | C18H30O  | 43    | 1117-52-8  | 901 | 906 | 1919 $\pm$ 5 (28)  | 1915 | 1915 | 1711945   | Yes | 1 |
| Benzaldehyde                                            | Benzenoid         | 10.228 | C7H6O    | 77.1  | 100-52-7   | 800 | 919 | 962 $\pm$ 3 (416)  | 965  | 965  | 240       | Yes | 1 |
| Benzyl alcohol *                                        | Benzenoid         | 12.439 | C7H8O    | 79.1  | 100-51-6   | 876 | 919 | 1036 $\pm$ 4 (174) | 1039 | 1039 | 244       | Yes | 1 |
| Benzeneacetaldehyde                                     | Benzenoid         | 12.724 | C8H8O    | 91.1  | 122-78-1   | 801 | 904 | 1045 $\pm$ 4 (378) | 1048 | 1048 | 998       |     | 2 |
| Phenol, 2-methoxy-3-(2-propenyl)-*                      | Benzenoid         | 21.611 | C10H12O2 | 164.1 | 25586-57-6 | 792 | 808 | 1377 $\pm$ 15 (2)  | 1357 | 1362 | 596373    |     | 2 |
| Benzofuran, 5-methoxy-6,7-dimethyl-                     | Benzenoid         | 24.599 | C11H12O2 | 161.1 | 35355-35-2 | 755 | 859 |                    | 1469 |      | 595346    |     | 3 |
| 1,8(2H,5H)-Naphthalenedione, hexahydro-8a-methyl-, cis- | Benzenoid         | 26.085 | C11H16O2 | 124.1 |            | 730 | 753 |                    | 1527 |      | 580218    |     | 3 |
| Hexadecanoic acid, butyl ester                          | Ester             | 33.509 | C20H40O2 | 56.1  | 111-06-8   | 793 | 847 | 2188 $\pm$ N/A (1) | 2187 | 2188 | 8090      | Yes | 1 |
| Tetradecane                                             | Hydrocarbon       | 22.769 | C14H30   | 57.1  | 629-59-4   | 922 | 928 | 1400               | 1400 | 1400 | 12389     | Yes | 1 |
| Pentadecane                                             | Hydrocarbon       | 25.426 | C15H32   | 57.1  | 629-62-9   | 881 | 886 | 1500               | 1500 | 1500 | 12391     | Yes | 1 |
| Hexadecane                                              | Hydrocarbon       | 27.891 | C16H34   | 57.1  | 544-76-3   | 886 | 879 | 1600               | 1600 | 1600 | 11006     | Yes | 1 |
| Heptadecane                                             | Hydrocarbon       | 29.387 | C17H36   | 57    | 629-78-7   | 805 | 810 | 1700               | 1700 | 1700 | 12398     | Yes | 1 |
| Octadecane                                              | Hydrocarbon       | 30.509 | C18H38   | 57.1  | 593-45-3   | 847 | 854 | 1800               | 1800 | 1800 | 11635     | Yes | 1 |
| Eicosane                                                | Hydrocarbon       | 32.225 | C20H42   | 57    | 112-95-8   | 891 | 895 | 2000               | 2000 | 2000 | 8222      | Yes | 1 |
| Heneicosane *                                           | Hydrocarbon       | 32.937 | C21H44   | 57    | 629-94-7   | 850 | 854 | 2100               | 2100 | 2100 | 12403     | Yes | 1 |
| Docosane *                                              | Hydrocarbon       | 33.591 | C22H46   | 57    | 629-97-0   | 884 | 885 | 2200               | 2200 | 2200 | 12405     | Yes | 1 |
| Tricosane                                               | Hydrocarbon       | 34.202 | C23H48   | 57    | 638-67-5   | 910 | 911 | 2300               | 2300 | 2300 | 12534     | Yes | 1 |
| 2-Pentanone, 4-hydroxy-4-methyl-                        | Ketone            | 6.696  | C6H12O2  | 43.1  | 123-42-2   | 808 | 908 | 838 $\pm$ 8 (27)   | 837  | 784  | 31256     |     | 2 |
| 2,5-Furandione, 3,4-dimethyl-                           | Ketone            | 12.328 | C6H6O3   | 54.1  | 766-39-2   | 876 | 908 | 1038 $\pm$ N/A (1) | 1035 | 1038 | 13010     |     | 2 |
| 1H-Pyrrole-2,5-dione, 3-ethyl-4-methyl-                 | Nitrogen volatile | 18.320 | C7H9NO2  | 139.1 | 20189-42-8 | 865 | 936 | 1239 $\pm$ 4 (7)   | 1237 | 1238 | 29995     |     | 2 |
| 1H-Pyrrole-2,5-dione, 3-ethenyl-4-methyl-               | Nitrogen volatile | 19.106 | C7H7NO2  | 66.1  | 21494-90-6 | 727 | 831 | 1261 $\pm$ N/A (1) | 1265 | 1261 | 152426    |     | 2 |

|                                                          |                 |        |          |       |             |     |     |              |             |      |          |     |   |
|----------------------------------------------------------|-----------------|--------|----------|-------|-------------|-----|-----|--------------|-------------|------|----------|-----|---|
| Oxepine, 2,7-dimethyl-                                   | Other           | 9.271  | C8H10O   | 122.1 | 1487-99-6   | 805 | 829 | 944±10 (2)   | 933         | 934  | 578868   |     | 2 |
| 2H-Pyran-2,6(3H)-dione *                                 | Other           | 11.168 | C5H4O3   | 55    | 5926-95-4   | 883 | 948 |              | 997         |      | 574367   |     | 2 |
| 3,5-Octadien-2-one, (E,E)-                               | Oxylin          | 13.453 | C8H12O   | 95.1  | 30086-02-3  | 841 | 889 | 1073±7 (13)  | 1072        | 1072 | 5352876  |     | 2 |
| Methyl salicylate                                        | Oxylin          | 17.185 | C8H8O3   | 120.1 | 119-36-8    | 775 | 916 | 1192±2 (145) | 1197        | 1197 | 4133     | Yes | 1 |
| Benzothiazole                                            | Sulfur volatile | 18.198 | C7H5NS   | 135.1 | 95-16-9     | 831 | 917 | 1229±8 (60)  | 1233        | 1234 | 7222     |     | 2 |
| Cyclohexene, 3-(1-methylethyl)-*                         | Terpenoid       | 9.599  | C9H16    | 81    | 3983-08-2   | 785 | 802 | 924±3 (7)    | 944         | 948  | 520966   |     | 2 |
| o-Cymene                                                 | Terpenoid       | 12.075 | C10H14   | 119.1 | 527-84-4    | 945 | 957 | 1022±2 (116) | 1027        | 1027 | 10703    | Yes | 1 |
| 2,6-Octadiene, 2,6-dimethyl-                             | Terpenoid       | 12.899 | C10H18   | 69.1  | 2792-39-4   | 817 | 844 | 978±1 (27)   | 1054        | 990  | 5365898  |     | 2 |
| p-Cymenene                                               | Terpenoid       | 14.106 | C10H12   | 117.1 | 1195-32-0   | 885 | 938 | 1090±2 (106) | 1093        | 1093 | 62385    | Yes | 1 |
| Geraniol *                                               | Terpenoid       | 18.767 | C10H18O  | 69.1  | 106-24-1    | 825 | 846 | 1255±3 (343) | 1253        | 1253 | 637566   |     | 2 |
| Cyclopropanem ethanol, 2-methyl-2-(4-methyl-3-pentenyl)- | Terpenoid       | 20.646 | C11H20O  | 69.1  | 98678-70-7  | 806 | 809 |              | 1321        |      | 549579   |     | 3 |
| Geranyl vinyl ether                                      | Terpenoid       | 20.837 | C12H20O  | 69.1  |             | 747 | 811 |              | 1328        |      | 5365842  |     | 3 |
| Cyclohexene, 1,5,5-trimethyl-6-acetylmethyl-             | Terpenoid       | 20.934 | C12H20O  | 123   | 211563-96-1 | 817 | 817 |              | 1331        |      | 579163   |     | 3 |
| beta.-Gurjunene                                          | Terpenoid       | 23.694 | C15H24   | 161.1 | 17334-55-3  | 805 | 896 | 1432±3 (234) | 1435        |      | 28481    |     | 2 |
| 9-epi-β-Caryophyllene                                    | Terpenoid       | 24.452 | C15H24   | 91.1  |             | 927 | 963 | 1466±3 (24)  | 1463        | 1460 | 6429301  | Yes | 1 |
| β-Selinene                                               | Terpenoid       | 25.269 | C15H24   | 105.1 | 17066-67-0  | 872 | 920 | 1486±3 (349) | 1494        | 1494 | 442393   |     | 2 |
| α-Selinene                                               | Terpenoid       | 25.473 | C15H24   | 189   | 473-13-2    | 860 | 894 | 1494±3 (196) | 1502        |      | 10856614 |     | 2 |
| γ-Cadinene                                               | Terpenoid       | 25.969 | C15H24   | 161.1 | 39029-41-9  | 853 | 921 | 1513±2 (485) | 1522        | 1515 | 92313    |     | 2 |
| 6,10-Dodecadien-1-yn-3-ol, 3,7,11-trimethyl-             | Terpenoid       | 26.181 | C15H24O  | 69.1  | 2387-68-0   | 782 | 797 | 1562±N/A (1) | 1530.629747 | 1562 | 5365823  |     | 2 |
| cis-Calamenene                                           | Terpenoid       | 26.228 | C15H22   | 159.1 | 72937-55-4  | 726 | 785 | 1531±N/A (1) | 1533        | 1567 | 6429077  |     | 2 |
| Dihydroactinidiolide                                     | Terpenoid       | 26.508 | C11H16O2 | 111.1 | 17092-92-1  | 949 | 954 | 1532±10 (26) | 1544        | 1537 | 27209    | Yes | 1 |

|                                                             |           |        |          |      |            |     |     |              |      |      |          |  |   |
|-------------------------------------------------------------|-----------|--------|----------|------|------------|-----|-----|--------------|------|------|----------|--|---|
| Epiglobulol                                                 | Terpenoid | 27.275 | C15H26O  | 43.1 |            | 828 | 861 |              | 1575 |      | 11858788 |  | 2 |
| (-)-Spathulenol                                             | Terpenoid | 27.579 | C15H24O  | 43   | 77171-55-2 | 882 | 894 | 1577±5 (6)   | 1587 |      | 13854255 |  | 2 |
| Globulol *                                                  | Terpenoid | 27.775 | C15H26O  | 43.1 | 489-41-8   | 806 | 865 | 1583±3 (203) | 1595 | 1590 | 12304985 |  | 2 |
| Spiro[4.5]decan-7-one, 1,8-dimethyl-8,9-epoxy-4-isopropyl-* | Terpenoid | 27.937 | C15H24O2 | 43.1 |            | 781 | 792 | 1626         | 1603 |      | 538938   |  | 2 |
| Phytol *                                                    | Terpenoid | 33.035 | C20H40O  | 71.1 | 150-86-7   | 804 | 882 | 2114±5 (66)  | 2115 | 2115 | 5280435  |  | 2 |
