# Supplementary material for: The Effect of Scale Insects on Growth Parameters of cv. Chardonnay and cv. Sauvignon Blanc Grapevines Grown in a Greenhouse
Source: MDPI journal article supplement (doi:10.3390/ijms24021544), 2023-01-12
Supplement: s1 [file s1]

**Table S2.** Individual samples of leaves used in the HS-SPME-GC/MS analysis showing the calculated relative VOC concentrations and the mean VOC concentrations in ng g<sup>-1</sup> against their corresponding authentic 10 µg/L standard. Each batch sample ID are leaves from an individual plant. Stdev = standard deviation, and RSD = relative standard deviation.

| Sample                                                           | Infected_SB | Mean Conc. (ng/g) | Stdev | %RSD |
|------------------------------------------------------------------|-------------|-------------|-------------|-------------|-------------|-------------|-------------|-------------|-------------|-------------------|-------|------|
| GC/MS Batch Sample ID                                            | 2           | 3           | 13          | 25          | 26          | 27          | 39          | 40          | 41          |                   |       |      |
| Sample Mass (g)                                                  | 0.523       | 0.5365      | 0.5035      | 0.5006      | 0.4999      | 0.5003      | 0.5046      | 0.4994      | 0.5035      |                   |       |      |
| Hexanal                                                          | 228.0       | 233.8       | 412.8       | 171.8       | 177.1       | 159.6       | 165.4       | 375.8       | 241.9       | 240.7             | 92.9  | 38.6 |
| 2-Hexenal, (E)-                                                  | 1121.1      | 875.6       | 1056.0      | 926.7       | 1277.2      | 825.4       | 1047.6      | 906.7       | 1202.1      | 1026.5            | 154.7 | 15.1 |
| 5-Hepten-2-one, 6-methyl-                                        | 118.5       | 135.9       | 159.4       | 100.3       | 127.6       | 129.3       | 120.9       | 92.5        | 121.7       | 122.9             | 19.4  | 15.8 |
| o-Cymene                                                         | 1.5         | 1.9         | 2.2         | 2.4         | 2.2         | 2.0         | 3.4         | 2.4         | 4.6         | 2.5               | 0.9   | 37.1 |
| 1-Hexanol, 2-ethyl-                                              | 8.0         | 6.2         | 3.1         | 7.1         | 7.4         | 5.2         | 6.2         | 5.6         | 7.2         | 6.2               | 1.5   | 23.7 |
| Benzyl alcohol                                                   | 24.2        | 7.4         | 11.5        | 9.1         | 8.7         | 18.1        | 12.1        | 11.4        | 8.0         | 12.3              | 5.5   | 44.8 |
| p-Cymenene                                                       | 4.4         | 7.1         | 9.6         | 9.7         | 9.2         | 7.0         | 17.3        | 7.6         | 15.8        | 9.7               | 4.2   | 43.3 |
| Phenylethyl Alcohol                                              | 27.8        | 27.1        | 17.8        | 35.0        | 32.1        | 29.6        | 31.9        | 32.6        | 28.7        | 29.2              | 5.0   | 17.0 |
| 2,6-Nonadienal, (E,Z)-                                           | 12.5        | 14.7        | 26.5        | 11.4        | 12.2        | 9.5         | 13.2        | 9.7         | 18.4        | 14.2              | 5.3   | 37.4 |
| Methyl salicylate                                                | 0.99        | 0.66        | 0.41        | 0.29        | 0.91        | 1.47        | 0.29        | 1.18        | 0.31        | 0.7               | 0.4   | 60.3 |
| Decanal                                                          | 11.95       | 12.02       | 34.70       | 14.73       | 22.69       | 20.35       | 16.91       | 32.89       | 15.83       | 20.2              | 8.5   | 41.8 |
| 1-Cyclohexene-1-carboxaldehyde, 2,6,6-trimethyl-                 | 3.30        | 3.57        | 4.95        | 2.56        | 4.07        | 2.47        | 3.45        | 2.22        | 5.55        | 3.6               | 1.1   | 31.6 |
| β-Citral                                                         | 1.66        | 1.50        | 0.77        | 1.45        | 1.55        | 1.55        | 1.23        | 1.62        | 1.86        | 1.5               | 0.3   | 21.2 |
| α-Citral                                                         | 5.48        | 5.53        | 3.22        | 6.04        | 5.61        | 7.06        | 5.53        | 6.51        | 7.31        | 5.8               | 1.2   | 20.5 |
| Propanoic acid, 2-methyl-, 3-hydroxy-2,2,4-trimethylpentyl ester | 82.45       | 86.71       | 103.59      | 92.19       | 110.71      | 93.84       | 107.67      | 115.38      | 108.27      | 100.1             | 11.6  | 11.6 |
| Tetradecane                                                      | 2.04        | 1.83        | 1.52        | 2.48        | 2.51        | 2.80        | 0.98        | 1.68        | 0.99        | 1.9               | 0.7   | 34.9 |
| α-Ionone                                                         | 2.41        | 3.03        | 4.25        | 1.63        | 3.55        | 1.91        | 1.24        | 2.26        | 2.20        | 2.5               | 1.0   | 38.2 |
| α,β-Dihydropseudoionone                                          | 32.60       | 32.58       | 38.84       | 30.84       | 32.86       | 34.95       | 30.16       | 30.25       | 27.63       | 32.3              | 3.2   | 10.0 |
| 9-epi-β-Caryophyllene                                            | 4.35        | 3.77        | 2.55        | 3.19        | 3.56        | 3.70        | 0.93        | 1.80        | 0.94        | 2.8               | 1.3   | 46.1 |
| trans-β-Ionone                                                   | 5.03        | 5.75        | 6.14        | 3.51        | 6.14        | 4.23        | 3.50        | 4.32        | 5.67        | 4.9               | 1.1   | 21.7 |
| β-Ionon-5,6-epoxide                                              | 19.07       | 20.67       | 28.52       | 13.27       | 21.21       | 15.33       | 14.36       | 16.33       | 20.74       | 18.8              | 4.7   | 24.9 |
| Pentadecane                                                      | 1.79        | 1.72        | 1.99        | 1.65        | 1.89        | 2.03        | 0.94        | 1.44        | 0.90        | 1.6               | 0.4   | 26.6 |
| Dihydro-actinidiolide                                            | 10.24       | 10.21       | 14.00       | 6.71        | 8.47        | 6.16        | 6.25        | 6.37        | 9.20        | 8.6               | 2.6   | 30.3 |
| Hexadecane                                                       | 5.35        | 5.53        | 6.35        | 5.03        | 6.58        | 6.48        | 4.56        | 6.24        | 4.50        | 5.6               | 0.8   | 14.6 |
| Heptadecane                                                      | 7.35        | 9.48        | 12.08       | 6.95        | 9.23        | 9.13        | 8.52        | 9.93        | 7.90        | 9.0               | 1.5   | 17.2 |
| Octadecane                                                       | 2.26        | 3.16        | 5.79        | 2.03        | 4.11        | 3.77        | 3.95        | 4.04        | 3.42        | 3.6               | 1.1   | 30.8 |
| Farnesyl acetone                                                 | 5.79        | 5.62        | 5.12        | 6.84        | 4.73        | 7.04        | 5.09        | 3.20        | 4.09        | 5.3               | 1.2   | 23.2 |
| Eicosane                                                         | 0.23        | 0.44        | 1.84        | 0.17        | 0.48        | 0.53        | 0.56        | 0.44        | 0.51        | 0.6               | 0.5   | 85.3 |
| Heneicosane                                                      | 0.03        | 0.02        | 0.26        | 0.02        | 0.15        | 0.17        | 0.18        | 0.17        | 0.19        | 0.1               | 0.1   | 66.3 |
| Hexadecanoic acid, butyl ester                                   | 13.33       | 17.81       | 23.20       | 6.82        | 9.60        | 10.89       | 17.63       | 6.85        | 6.95        | 12.6              | 5.9   | 46.7 |
| Docosane                                                         | 0.00        | 0.01        | 0.15        | 0.00        | 0.09        | 0.10        | 0.16        | 0.14        | 0.09        | 0.1               | 0.1   | 76.2 |
| Tricosane                                                        | 0.00        | 0.00        | 0.13        | 0.08        | 0.19        | 0.16        | 0.28        | 0.25        | 0.18        | 0.1               | 0.1   | 70.5 |

| Sample                                                           | SB     | Mean Conc. (ng/g) | Stdev | %RSD  |
|------------------------------------------------------------------|--------|--------|--------|--------|--------|--------|--------|--------|--------|-------------------|-------|-------|
| GC/MS Batch Sample ID                                            | 4      | 5      | 6      | 19     | 20     | 21     | 33     | 34     | 35     |                   |       |       |
| Mass (g)                                                         | 0.4998 | 0.5079 | 0.5087 | 0.5011 | 0.5022 | 0.4995 | 0.501  | 0.5034 | 0.5019 |                   |       |       |
| Hexanal                                                          | 228.3  | 245.0  | 205.2  | 230.7  | 243.2  | 202.1  | 210.7  | 235.4  | 223.4  | 224.9             | 15.8  | 7.0   |
| 2-Hexenal, (E)-                                                  | 1246.2 | 996.9  | 971.6  | 916.5  | 1331.4 | 1160.8 | 1298.1 | 1270.6 | 1186.8 | 1153.2            | 154.0 | 13.4  |
| 5-Hepten-2-one, 6-methyl-                                        | 125.2  | 120.4  | 161.0  | 178.9  | 94.5   | 99.7   | 91.2   | 132.8  | 100.0  | 122.6             | 30.8  | 25.1  |
| o-Cymene                                                         | 1.3    | 1.8    | 2.3    | 2.6    | 2.7    | 2.6    | 2.2    | 2.5    | 3.0    | 2.3               | 0.5   | 22.1  |
| 1-Hexanol, 2-ethyl-                                              | 8.0    | 5.6    | 6.1    | 6.4    | 7.0    | 7.7    | 11.0   | 6.8    | 9.1    | 7.5               | 1.7   | 22.4  |
| Benzyl alcohol                                                   | 23.6   | 25.5   | 21.1   | 20.9   | 70.1   | 7.1    | 12.9   | 56.2   | 10.4   | 27.5              | 21.4  | 77.7  |
| p-Cymenene                                                       | 3.0    | 3.4    | 9.4    | 10.3   | 16.3   | 8.7    | 8.9    | 13.6   | 10.3   | 9.3               | 4.2   | 45.3  |
| Phenylethyl Alcohol                                              | 32.3   | 27.9   | 28.1   | 27.2   | 28.8   | 33.4   | 38.6   | 31.4   | 31.7   | 31.1              | 3.6   | 11.5  |
| 2,6-Nonadienal, (E,Z)-                                           | 11.2   | 10.5   | 18.9   | 20.0   | 22.4   | 12.9   | 12.5   | 16.7   | 16.9   | 15.8              | 4.2   | 26.6  |
| Methyl salicylate                                                | 8.95   | 4.18   | 0.32   | 0.98   | 0.79   | 0.26   | 1.40   | 1.68   | 0.59   | 2.1               | 2.8   | 132.7 |
| Decanal                                                          | 19.76  | 24.98  | 12.93  | 19.32  | 10.53  | 13.17  | 20.64  | 21.56  | 20.42  | 18.1              | 4.8   | 26.4  |
| 1-Cyclohexene-1-carboxaldehyde, 2,6,6-trimethyl-                 | 2.95   | 2.78   | 4.07   | 4.62   | 3.12   | 3.11   | 2.53   | 3.59   | 4.33   | 3.5               | 0.7   | 21.2  |
| β-Citral                                                         | 1.36   | 0.89   | 0.96   | 1.31   | 1.00   | 1.67   | 1.48   | 1.40   | 2.22   | 1.4               | 0.4   | 30.1  |
| α-Citral                                                         | 4.70   | 3.92   | 4.70   | 5.34   | 4.95   | 5.83   | 5.22   | 4.95   | 6.51   | 5.1               | 0.7   | 14.4  |
| Propanoic acid, 2-methyl-, 3-hydroxy-2,2,4-trimethylpentyl ester | 58.32  | 75.12  | 87.50  | 117.68 | 113.60 | 86.73  | 89.21  | 117.35 | 120.21 | 96.2              | 22.0  | 22.9  |
| Tetradecane                                                      | 2.40   | 2.35   | 1.54   | 2.56   | 2.07   | 2.52   | 2.49   | 2.06   | 2.43   | 2.3               | 0.3   | 14.4  |
| α-Ionone                                                         | 3.53   | 2.81   | 2.27   | 2.57   | 1.63   | 2.54   | 1.85   | 2.04   | 3.36   | 2.5               | 0.6   | 25.8  |
| α,β-Dihydropseudoionone                                          | 32.35  | 33.19  | 37.27  | 35.11  | 31.39  | 31.47  | 28.88  | 32.04  | 29.49  | 32.4              | 2.6   | 8.1   |
| 9-epi-β-Caryophyllene                                            | 4.27   | 3.72   | 3.47   | 2.95   | 1.63   | 3.18   | 3.43   | 2.21   | 3.21   | 3.1               | 0.8   | 25.3  |
| trans-β-Ionone                                                   | 5.29   | 3.53   | 5.64   | 6.29   | 4.62   | 4.95   | 3.95   | 4.69   | 6.75   | 5.1               | 1.0   | 20.5  |
| β-Ionon-5,6-epoxide                                              | 21.33  | 19.99  | 21.77  | 21.74  | 15.43  | 18.40  | 13.64  | 17.18  | 21.57  | 19.0              | 3.0   | 15.9  |
| Pentadecane                                                      | 2.36   | 2.79   | 1.65   | 1.86   | 1.32   | 1.68   | 1.65   | 1.57   | 1.82   | 1.9               | 0.4   | 24.1  |
| Dihydro-actinidiolide                                            | 11.49  | 9.75   | 9.91   | 9.82   | 6.96   | 8.77   | 7.76   | 8.51   | 11.23  | 9.4               | 1.5   | 16.1  |
| Hexadecane                                                       | 7.04   | 6.56   | 6.00   | 6.79   | 5.50   | 5.85   | 5.24   | 5.97   | 6.26   | 6.1               | 0.6   | 9.6   |
| Heptadecane                                                      | 11.15  | 12.65  | 11.58  | 10.01  | 10.11  | 9.43   | 6.70   | 10.48  | 10.25  | 10.3              | 1.6   | 16.1  |
| Octadecane                                                       | 4.16   | 5.85   | 4.10   | 4.39   | 5.36   | 3.08   | 2.57   | 4.45   | 3.22   | 4.1               | 1.1   | 25.7  |
| Farnesyl acetone                                                 | 4.91   | 5.28   | 7.71   | 7.50   | 5.20   | 5.23   | 3.97   | 5.78   | 3.29   | 5.4               | 1.4   | 26.6  |
| Eicosane                                                         | 0.54   | 1.09   | 0.35   | 1.02   | 1.10   | 0.39   | 0.46   | 0.74   | 0.49   | 0.7               | 0.3   | 45.0  |
| Heneicosane                                                      | 0.25   | 0.25   | 0.07   | 0.62   | 0.55   | 0.21   | 0.42   | 0.59   | 0.39   | 0.4               | 0.2   | 51.1  |
| Hexadecanoic acid, butyl ester                                   | 7.88   | 4.12   | 22.58  | 16.68  | 17.23  | 9.84   | 14.78  | 13.78  | 7.16   | 12.7              | 5.9   | 46.3  |
| Docosane                                                         | 0.17   | 0.23   | 0.11   | 0.62   | 0.50   | 0.20   | 0.52   | 0.62   | 0.41   | 0.4               | 0.2   | 53.4  |
| Tricosane                                                        | 0.08   | 0.13   | 0.06   | 0.63   | 0.52   | 0.26   | 0.49   | 0.68   | 0.46   | 0.4               | 0.2   | 65.1  |

| Sample                                                           | Infected_Char | Mean Conc. (ng/g) | Stdev | %RSD  |
|------------------------------------------------------------------|---------------|---------------|---------------|---------------|---------------|---------------|---------------|---------------|---------------|-------------------|-------|-------|
| GC/MS Batch Sample ID                                            | 7             | 8             | 9             | 22            | 23            | 24            | 36            | 37            | 38            |                   |       |       |
| Mass (g)                                                         | 0.5012        | 0.5135        | 0.4995        | 0.5007        | 0.5002        | 0.5009        | 0.4035        | 0.499         | 0.5045        |                   |       |       |
| Hexanal                                                          | 323.9         | 225.3         | 260.1         | 167.2         | 154.1         | 189.5         | 222.4         | 176.0         | 261.1         | 220.0             | 54.9  | 25.0  |
| 2-Hexenal, (E)-                                                  | 1304          | 843.9         | 1030          | 1194          | 1015          | 839.0         | 1487          | 1247          | 1186          | 1127.3            | 214.5 | 19.0  |
| 5-Hepten-2-one, 6-methyl-                                        | 144.7         | 135.4         | 151.6         | 81.0          | 125.5         | 97.7          | 160.5         | 103.4         | 82.6          | 120.3             | 30.0  | 25.0  |
| o-Cymene                                                         | 3.1           | 2.2           | 2.3           | 2.1           | 2.3           | 2.9           | 4.3           | 3.3           | 3.5           | 2.9               | 0.7   | 25.9  |
| 1-Hexanol, 2-ethyl-                                              | 10.4          | 6.5           | 5.8           | 12.0          | 9.0           | 7.4           | 12.6          | 10.2          | 6.3           | 8.9               | 2.5   | 28.6  |
| Benzyl alcohol                                                   | 28.0          | 18.5          | 18.0          | 50.3          | 55.4          | 51.1          | 44.9          | 31.1          | 16.6          | 34.9              | 15.7  | 45.0  |
| p-Cymenene                                                       | 10.3          | 9.3           | 11.3          | 8.5           | 6.8           | 15.6          | 18.9          | 18.6          | 21.1          | 13.4              | 5.2   | 39.1  |
| Phenylethyl Alcohol                                              | 26.6          | 30.3          | 30.2          | 37.6          | 32.3          | 34.7          | 33.3          | 37.2          | 31.6          | 32.7              | 3.5   | 10.8  |
| 2,6-Nonadienal, (E,Z)-                                           | 16.3          | 14.0          | 15.5          | 12.0          | 14.6          | 17.8          | 18.6          | 21.6          | 28.6          | 17.7              | 5.0   | 28.2  |
| Methyl salicylate                                                | 2.67          | 0.54          | 1.43          | 1.41          | 0.98          | 0.97          | 4.16          | 0.93          | 0.29          | 1.5               | 1.2   | 81.5  |
| Decanal                                                          | 19.32         | 9.95          | 14.56         | 17.99         | 8.67          | 12.88         | 32.12         | 20.04         | 15.61         | 16.8              | 7.0   | 41.5  |
| 1-Cyclohexene-1-carboxaldehyde, 2,6,6-trimethyl-                 | 3.68          | 3.13          | 2.81          | 2.24          | 2.22          | 2.29          | 3.80          | 3.91          | 4.54          | 3.2               | 0.8   | 26.6  |
| β-Citral                                                         | 4.40          | 1.35          | 1.19          | 1.56          | 0.83          | 1.18          | 1.79          | 1.03          | 1.29          | 1.6               | 1.1   | 66.3  |
| α-Citral                                                         | 12.14         | 5.32          | 4.84          | 5.31          | 4.32          | 5.10          | 5.79          | 5.60          | 3.94          | 5.8               | 2.4   | 42.0  |
| Propanoic acid, 2-methyl-, 3-hydroxy-2,2,4-trimethylpentyl ester | 110.6         | 79.38         | 95.16         | 97.37         | 53.47         | 95.12         | 130.7         | 127.6         | 111.3         | 100.1             | 23.9  | 23.9  |
| Tetradecane                                                      | 2.43          | 2.08          | 1.78          | 2.43          | 0.68          | 1.70          | 1.61          | 1.27          | 1.09          | 1.7               | 0.6   | 35.5  |
| α-Ionone                                                         | 3.99          | 2.89          | 2.90          | 1.90          | 1.28          | 1.48          | 3.18          | 2.89          | 3.04          | 2.6               | 0.9   | 33.7  |
| α,β-Dihydropseudoionone                                          | 34.26         | 32.77         | 36.92         | 28.49         | 27.63         | 29.54         | 36.44         | 31.4          | 29.58         | 31.9              | 3.4   | 10.7  |
| 9-epi-β-Caryophyllene                                            | 2.64          | 3.43          | 3.49          | 3.67          | 0.88          | 2.09          | 1.45          | 1.19          | 0.84          | 2.2               | 1.2   | 53.0  |
| trans-β-Ionone                                                   | 6.81          | 4.28          | 4.62          | 3.77          | 2.31          | 2.99          | 5.04          | 6.12          | 6.27          | 4.7               | 1.5   | 32.6  |
| β-Ionon-5,6-epoxide                                              | 20.58         | 16.11         | 15.30         | 13.84         | 9.23          | 11.81         | 19.88         | 20.68         | 20.25         | 16.4              | 4.2   | 25.8  |
| Pentadecane                                                      | 1.87          | 1.80          | 1.87          | 1.59          | 0.42          | 1.11          | 1.16          | 1.16          | 0.84          | 1.3               | 0.5   | 38.5  |
| Dihydro-actinidiolide                                            | 7.45          | 7.08          | 7.29          | 6.23          | 5.51          | 6.17          | 8.19          | 9.13          | 10.27         | 7.5               | 1.5   | 20.2  |
| Hexadecane                                                       | 7.36          | 5.44          | 6.55          | 4.90          | 1.66          | 3.96          | 6.01          | 5.36          | 3.64          | 5.0               | 1.7   | 34.3  |
| Heptadecane                                                      | 13.24         | 9.15          | 11.34         | 7.66          | 3.30          | 7.14          | 11.39         | 8.61          | 5.93          | 8.6               | 3.1   | 35.5  |
| Octadecane                                                       | 5.73          | 2.94          | 3.81          | 2.34          | 1.75          | 3.10          | 6.29          | 4.80          | 3.43          | 3.8               | 1.5   | 40.2  |
| Farnesyl acetone                                                 | 7.04          | 5.71          | 6.80          | 3.97          | 4.04          | 5.55          | 4.55          | 4.52          | 4.66          | 5.2               | 1.1   | 21.9  |
| Eicosane                                                         | 0.67          | 0.35          | 0.30          | 0.30          | 0.31          | 0.51          | 1.17          | 0.76          | 0.77          | 0.6               | 0.3   | 52.2  |
| Heneicosane                                                      | 0.24          | 0.04          | 0.11          | 0.12          | 0.11          | 0.23          | 0.57          | 0.60          | 0.98          | 0.3               | 0.3   | 94.7  |
| Hexadecanoic acid, butyl ester                                   | 5.76          | 17.04         | 14.01         | 11.88         | 14.71         | 9.33          | 18.32         | 7.97          | 8.60          | 12.0              | 4.3   | 36.3  |
| Docosane                                                         | 0.13          | 0.03          | 0.02          | 0.07          | 0.09          | 0.07          | 0.53          | 0.44          | 0.42          | 0.2               | 0.2   | 100.6 |
| Tricosane                                                        | 0.01          | 0.00          | 0.00          | 0.13          | 0.13          | 0.16          | 0.58          | 0.54          | 0.54          | 0.2               | 0.2   | 106.6 |

| Sample                                                           | Char   | Mean Conc. (ng/g) | Stdev | %RSD |
|------------------------------------------------------------------|--------|--------|--------|--------|--------|--------|--------|--------|--------|-------------------|-------|------|
| GC/MS Batch Sample ID                                            | 10     | 11     | 12     | 16     | 17     | 18     | 30     | 31     | 32     |                   |       |      |
| Mass (g)                                                         | 0.5024 | 0.5026 | 0.5017 | 0.4992 | 0.5003 | 0.5015 | 0.5019 | 0.5016 | 0.5034 |                   |       |      |
| Hexanal                                                          | 200.1  | 147.0  | 194.4  | 200.2  | 163.5  | 240.0  | 128.8  | 182.4  | 321.7  | 197.6             | 56.9  | 28.8 |
| 2-Hexenal, (E)-                                                  | 1162.4 | 968.4  | 924.6  | 1065.1 | 1147.4 | 842.0  | 921.4  | 1313.6 | 1004.5 | 1038.8            | 147.9 | 14.2 |
| 5-Hepten-2-one, 6-methyl-                                        | 165.0  | 150.3  | 110.3  | 125.1  | 124.7  | 80.6   | 140.9  | 173.7  | 94.2   | 129.4             | 31.3  | 24.2 |
| o-Cymene                                                         | 2.2    | 1.6    | 2.5    | 1.7    | 2.3    | 2.5    | 2.2    | 2.1    | 2.7    | 2.2               | 0.4   | 16.6 |
| 1-Hexanol, 2-ethyl-                                              | 6.7    | 6.4    | 7.1    | 4.7    | 8.4    | 6.2    | 5.2    | 6.1    | 6.2    | 6.3               | 1.0   | 16.5 |
| Benzyl alcohol                                                   | 21.7   | 62.9   | 17.4   | 65.9   | 55.1   | 22.3   | 27.3   | 63.1   | 21.4   | 39.7              | 21.3  | 53.6 |
| p-Cymenene                                                       | 10.0   | 7.2    | 11.3   | 7.5    | 12.1   | 10.9   | 13.6   | 9.4    | 12.4   | 10.5              | 2.2   | 20.8 |
| Phenylethyl Alcohol                                              | 31.0   | 38.3   | 33.7   | 33.9   | 36.6   | 28.9   | 33.9   | 34.9   | 30.6   | 33.5              | 3.0   | 8.9  |
| 2,6-Nonadienal, (E,Z)-                                           | 25.2   | 14.6   | 14.3   | 14.1   | 18.7   | 14.5   | 15.0   | 18.4   | 14.3   | 16.6              | 3.7   | 22.3 |
| Methyl salicylate                                                | 0.39   | 0.48   | 0.98   | 1.40   | 0.46   | 0.50   | 1.37   | 2.19   | 1.15   | 1.0               | 0.6   | 60.9 |
| Decanal                                                          | 13.22  | 15.01  | 10.51  | 33.23  | 14.71  | 15.39  | 24.83  | 14.44  | 21.38  | 18.1              | 7.1   | 39.5 |
| 1-Cyclohexene-1-carboxaldehyde, 2,6,6-trimethyl-                 | 4.98   | 2.81   | 3.12   | 2.34   | 3.26   | 2.49   | 1.92   | 2.78   | 2.48   | 2.9               | 0.9   | 30.1 |
| β-Citral                                                         | 1.40   | 1.19   | 1.59   | 1.02   | 1.62   | 1.27   | 1.17   | 1.15   | 1.42   | 1.3               | 0.2   | 15.8 |
| α-Citral                                                         | 5.93   | 5.58   | 6.29   | 4.19   | 6.79   | 4.31   | 5.57   | 4.58   | 6.07   | 5.5               | 0.9   | 16.8 |
| Propanoic acid, 2-methyl-, 3-hydroxy-2,2,4-trimethylpentyl ester | 100.7  | 59.42  | 85.64  | 92.28  | 100.4  | 103.4  | 120.9  | 63.41  | 110.1  | 92.9              | 20.5  | 22.0 |
| Tetradecane                                                      | 2.01   | 1.72   | 2.13   | 2.12   | 2.81   | 2.53   | 2.57   | 1.29   | 2.09   | 2.1               | 0.5   | 21.5 |
| α-Ionone                                                         | 4.76   | 2.31   | 3.32   | 3.06   | 2.74   | 2.85   | 2.10   | 2.81   | 2.34   | 2.9               | 0.8   | 27.1 |
| α,β-Dihydropseudoionone                                          | 38.56  | 34.26  | 33.58  | 35.01  | 32.59  | 27.99  | 32.66  | 35.43  | 28.86  | 33.2              | 3.3   | 9.8  |
| 9-epi-β-Caryophyllene                                            | 3.75   | 3.07   | 4.25   | 2.66   | 3.92   | 2.35   | 2.49   | 0.91   | 1.75   | 2.8               | 1.1   | 38.6 |
| trans-β-Ionone                                                   | 8.38   | 3.99   | 5.14   | 4.44   | 4.97   | 4.07   | 3.95   | 4.16   | 4.09   | 4.8               | 1.4   | 29.4 |
| β-Ionon-5,6-epoxide                                              | 28.57  | 13.89  | 18.85  | 15.22  | 18.51  | 13.72  | 12.72  | 14.82  | 15.50  | 16.9              | 4.9   | 28.8 |
| Pentadecane                                                      | 2.01   | 1.66   | 1.93   | 2.02   | 2.06   | 1.58   | 2.07   | 0.82   | 1.68   | 1.8               | 0.4   | 22.8 |
| Dihydro-actinidiolide                                            | 12.98  | 7.56   | 8.82   | 7.51   | 8.45   | 6.42   | 6.09   | 7.95   | 6.88   | 8.1               | 2.0   | 25.3 |
| Hexadecane                                                       | 7.10   | 5.04   | 6.10   | 5.95   | 6.40   | 5.79   | 7.22   | 3.40   | 5.87   | 5.9               | 1.1   | 19.5 |
| Heptadecane                                                      | 14.16  | 6.92   | 10.75  | 11.04  | 8.85   | 1.39   | 12.71  | 6.45   | 10.54  | 9.2               | 3.8   | 41.8 |
| Octadecane                                                       | 5.26   | 2.71   | 3.20   | 3.91   | 3.78   | 4.47   | 4.68   | 3.79   | 4.06   | 4.0               | 0.8   | 19.2 |
| Farnesyl acetone                                                 | 8.59   | 6.73   | 6.21   | 6.08   | 5.13   | 3.40   | 3.76   | 6.45   | 3.39   | 5.5               | 1.8   | 31.9 |
| Eicosane                                                         | 0.60   | 0.24   | 0.16   | 1.56   | 1.12   | 0.99   | 1.90   | 1.38   | 0.90   | 1.0               | 0.6   | 59.4 |
| Heneicosane                                                      | 0.29   | 0.03   | 0.00   | 1.57   | 0.91   | 0.74   | 2.17   | 1.35   | 0.94   | 0.9               | 0.7   | 81.8 |
| Hexadecanoic acid, butyl ester                                   | 8.80   | 6.11   | 11.33  | 20.98  | 15.00  | 12.27  | 17.45  | 9.27   | 7.93   | 12.1              | 4.9   | 40.0 |
| Docosane                                                         | 0.04   | 0.00   | 0.00   | 1.58   | 0.99   | 0.76   | 2.46   | 1.59   | 1.07   | 0.9               | 0.8   | 89.8 |
| Tricosane                                                        | 0.06   | 0.00   | 0.01   | 1.08   | 0.73   | 0.55   | 1.90   | 1.35   | 1.04   | 0.7               | 0.7   | 88.5 |
